# Supplementary material
Source: PubMed Central journal article supplement (PMC6031884)
Supplement: BPH-175-3144-s001.pdf [file BPH-175-3144-s001.pdf]

## Supplementary information

### Synthesis of RU1968

All reactions were performed under an inert atmosphere of argon or nitrogen, unless otherwise stated.  $^1\text{H}$  and  $^{13}\text{C}$  NMR spectra were obtained on a Bruker Avance DPX 400 or DPX 500 spectrometer (Bruker Daltonics, Bremen, Germany) at 298 K; chemical shifts are expressed in parts per million (ppm) with respect to the solvent signals ( $^1\text{H}$  NMR:  $\text{CDCl}_3$  7.27;  $\text{DMSO}-d_6$  2.50;  $\text{MeOD}$  3.31;  $^{13}\text{C}$  NMR:  $\text{CDCl}_3$  77.16;  $\text{MeOD}$  49.00). Analytical HPLC was performed on a Shimadzu Prominence system (Shimadzu, Tokyo, Japan) using a Nucleodur Isis column ( $4 \times 150$  mm,  $5 \mu\text{m}$  Macherey&Nagel, Düren, Germany) with a binary gradient of  $\text{H}_2\text{O}$  and Acetonitrile (each containing 0.1% (v/v) trifluoroacetic acid (TFA)) at a flow rate of 1 ml/min. Preparative HPLC was performed on a Shimadzu LC-8A system using a Nucleodur Isis column (20 ml/min,  $21 \times 250$  mm,  $5 \mu\text{m}$ ) with gradients of  $\text{H}_2\text{O}$  and Acetonitrile (each containing 0.1% (v/v) TFA) at a flow rate of 20 ml/min. High-resolution mass spectra (HRMS) were obtained on a MAT 95 XL or MAT 90 mass spectrometer (Thermo Finnigan, San Jose, USA). All reagents were obtained from Sigma–Aldrich (Munich, Germany) and were used as received. ( $\pm$ ) Estrone methylether was synthesized as previously described (Ananchenko et al., 1962, Ananchenko and Torgov, 1963). Nitrile **1** was obtained from ( $\pm$ ) estrone methylether following a published procedure (Van Leusen and Van Leusen, 2004).

#### 1-(3-methoxy-13-methyl-7,8,9,11,12,13,14,15,16,17-decahydro-6H-cyclopenta[a]phenanthren-17-yl) ethanone (**2**):

To a  $0^\circ\text{C}$  solution of nitrile **1** (3.973 g; 13.45 mmol) in dry  $\text{Et}_2\text{O}$  (67 ml) was added  $\text{MeLi}$  (1.6 M in  $\text{Et}_2\text{O}$ , 67.3 ml; 107.6 mmol) over 20 minutes. After stirring for further 10 minutes at  $0^\circ\text{C}$ , the reaction was quenched by careful addition of  $\text{H}_2\text{O}$  (20 ml) and stirred for another 30 minutes. The mixture was acidified with conc.  $\text{HCl}$  ( $\text{pH} = 1$ ) and the  $\text{Et}_2\text{O}$  evaporated *in vacuo*. The resulting slurry was taken up in  $\text{DCM}$  (200 ml), the aqueous layer separated and extracted with another portion of  $\text{DCM}$ . Organic layers were combined, washed with sat.  $\text{NaHCO}_3$  (aq), dried (brine,  $\text{MgSO}_4$ ), filtered, and the solvent evaporated *in vacuo*. The crude material was purified by flash chromatography using a silica gel column with a gradient of pentane/ethylacetate (98/2 to 92/8) to obtain **2** as an off-white solid (3.34 g, 79%, 1:1 mixture of diastereomers).

**$^1\text{H}$ -NMR** (400 MHz,  $\text{CDCl}_3$ )  $\delta = 7.21$  d (1H,  $J = 8.6$  Hz), 7.18 d (1H,  $J = 8.6$  Hz), 6.72 (m, 2H), 6.64 (m, 2H), 3.79 (s, 3H), 3.78 (s, 3H), 2.87 (m, 3H), 2.63 (t, 1H,  $J = 9.1$  Hz), 2.40 – 2.15 (m, 6H), 2.18 (s, 3H), 2.17 (s, 3H), 2.03 – 1.27 (m, 22H), 0.96 (s, 3H), 0.67 (s, 3H).

**$^{13}\text{C}$ -NMR** (100 MHz,  $\text{CDCl}_3$ )  $\delta = 212.98$  (CO), 209.59 (CO), 157.62 (C), 157.57 (C), 138.15 (C), 138.04 (C), 132.63 (C), 132.49 (C), 126.36 (CH), 113.91 (CH), 113.87 (CH), 111.64 (CH), 111.59 (CH), 63.98 (CH), 61.47 (CH), 55.79 (CH), 55.30 ( $\text{CH}_3$ ), 49.45 (CH), 46.13 (C), 44.53 (C), 43.79 (CH), 43.26 (CH), 39.14 (CH), 39.12 ( $\text{CH}_2$ ), 38.87 (CH), 35.40 ( $\text{CH}_2$ ), 33.03 ( $\text{CH}_3$ ), 31.62 ( $\text{CH}_3$ ), 30.02 ( $\text{CH}_2$ ), 29.94 ( $\text{CH}_2$ ), 28.13 ( $\text{CH}_2$ ), 27.80 ( $\text{CH}_2$ ), 26.78 ( $\text{CH}_2$ ), 26.71 ( $\text{CH}_2$ ), 25.72 ( $\text{CH}_2$ ), 24.25 ( $\text{CH}_2$ ), 22.99 ( $\text{CH}_2$ ), 21.04 ( $\text{CH}_3$ ), 13.53 ( $\text{CH}_3$ ).

**HRMS:** Calc. for  $\text{C}_{21}\text{H}_{28}\text{O}_2\text{H}^+$  ( $M + H$ ) 313.2168, found 313.2176.

#### N1-(1-(3-methoxy-13-methyl-7,8,9,11,12,13,14,15,16,17-decahydro-6H-cyclopenta[a]phenanthren-17-yl)ethyl)-N2,N2-dimethylethane-1,2-diamine (**3**):

To a solution of **2** (1.3 g, 4.16 mmol) in 1,2-dichloroethane (25 ml) were added  $\text{AcOH}$  (50 mmol, 2.87 ml),  $\text{N,N}$ -dimethylethylenediamine (41.6 mmol, 4.5 ml), activated molsieves ( $4 \text{ \AA}$ ;  $\sim 1$  g), and  $\text{NaBH}(\text{OAc})_3$  (12.5 mmol, 2.66 g). The mixture was stirred for 18 h at RT, filtered and evaporated. The residue was taken up in  $\text{Et}_2\text{O}$  and washed with 1M  $\text{NaOH}$ , followed by sat.  $\text{NaCl}$

(aq). The organic layer was dried (MgSO<sub>4</sub>), filtered and evaporated to obtain a crude oil that was purified by flash chromatography. Careful elution with DCM/MeOH (97/3 to 9/1) afforded **3a** (582 mg, 36%); **3b** (330 mg, 25%) was eluted with DCM/MeOH 6/4.

**3a: 1H-NMR** (400 MHz, CDCl<sub>3</sub>)  $\delta$  = 7.19 (m, 2H), 6.70 (m, 2H), 6.62 (m, 2H), 3.76 (s, 6H), 2.95-2.75 (m, 8H), 2.69-2.48 (m, 6H), 2.42-2.10 (m, 10H), 2.25 (s, 6H), 2.22 (s, 6H), 1.95-1.12 (m, 18H), 1.09 (d, 6H, J=6.2 Hz), 0.80 (s, 3H), 0.73 (s, 3H).

**13C-NMR** (100 MHz, CDCl<sub>3</sub>)  $\delta$  = 157.28 (C), 137.99 (C), 137.82 (C), 132.79 (C), 132.67 (C), 126.15 (CH), 113.62 (CH), 111.33 (CH), 111.32 (CH), 58.57 (CH<sub>2</sub>), 58.04 (CH<sub>2</sub>), 56.55 (CH), 55.82 (CH), 55.07 (CH<sub>3</sub>), 54.88 (CH), 54.37 (CH), 54.12 (CH), 52.07 (CH), 45.33 (CH<sub>3</sub>), 45.14 (CH<sub>3</sub>), 44.97 (CH<sub>2</sub>), 44.34 (CH<sub>2</sub>), 43.65 (CH), 43.54 (C), 43.45 (CH), 42.36 (C), 39.78 (CH<sub>2</sub>), 39.15 (CH), 38.61 (CH), 33.89 (CH<sub>2</sub>), 29.85 (CH<sub>2</sub>), 29.74 (CH<sub>2</sub>), 28.25 (CH<sub>2</sub>), 27.53 (CH<sub>2</sub>), 26.73 (CH<sub>2</sub>), 26.70 (CH<sub>2</sub>), 26.62 (CH<sub>2</sub>), 25.64 (CH<sub>2</sub>), 23.75 (CH<sub>2</sub>), 22.58 (CH<sub>2</sub>), 22.00 (CH<sub>3</sub>), 19.95 (CH<sub>3</sub>), 18.55 (CH<sub>3</sub>), 12.31 (CH<sub>3</sub>).

**HRMS:** Calc. for C<sub>25</sub>H<sub>40</sub>N<sub>2</sub>OH<sup>+</sup> (M + H) 385.3219, found 371.3221.

**3b: 1H-NMR** (400 MHz, CDCl<sub>3</sub>)  $\delta$  = 7.20 (m, 2H), 6.70 (m, 2H), 6.62 (m, 2H), 3.77 (s, 6H), 2.94-2.72 (m, 6H), 2.68-2.40 (m, 8H), 2.40-1.20 (m, 28H), 2.24 (s, 6H), 2.23 (s, 6H), 1.15 (d, 3H, J=6.5 Hz), 1.04 (d, 3H, J=6.2 Hz), 0.85 (s, 3H), 0.72 (s, 3H).

**13C-NMR** (100 MHz, CDCl<sub>3</sub>)  $\delta$  = 155.15 (C), 138.32 (C), 131.78 (C), 126.74 (CH), 115.73 (CH), 113.31 (CH), 58.33 (CH<sub>2</sub>), 55.54 (CH), 51.38 (CH), 45.11 (CH<sub>3</sub>), 44.12 (CH<sub>2</sub>), 43.58 (CH), 41.23 (C), 39.76 (CH), 39.31 (CH<sub>2</sub>), 30.11 (CH<sub>2</sub>), 28.19 (CH<sub>2</sub>), 27.07 (CH<sub>2</sub>), 26.91 (CH<sub>2</sub>), 24.42 (CH<sub>2</sub>), 16.91 (CH<sub>3</sub>), 12.43 (CH<sub>3</sub>).

**HRMS:** Calc. for C<sub>25</sub>H<sub>40</sub>N<sub>2</sub>OH<sup>+</sup> (M + H) 385.3219, found 371.3228.

#### 17-(1-(2-(dimethylamino)ethylamino)ethyl)-13-methyl-7,8,9,11,12,13,14,15,16,17-

**decahydro-6H-cyclopenta[a]phenanthren-3-ol (RU1968F1 + RU1968F2):** A suspension of **3a** (52 mg, 0.135 mmol) in 48% HBr (aq) (1.8 ml) was heated at 100°C in a sealed vial for 6 h, cooled to RT and diluted with ethyl acetate and water. The resulting mixture was

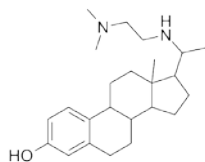

neutralized by incremental addition of Na<sub>2</sub>CO<sub>3</sub> (s), the aqueous layer separated, and extracted with ethyl acetate. Organic layers were combined, washed with brine, dried (MgSO<sub>4</sub>), filtered, and the solvent evaporated *in vacuo*. The resulting material was purified by flash chromatography on a silica gel column (DCM/MeOH 96/4 + 0.4% NH<sub>4</sub>OH (28% aq)) to obtain 38 mg (76%) brown foam. Further purification on preparative HPLC (Gradient: 20% Acetonitrile to 25% over 60 minutes) afforded **RU1968F1 \* 2 TFA** (25 mg, 31%) and **RU1968F2 \* 2 TFA** (5 mg, 6%) as white solids. **RU1968F3 + F4: 3b** (48 mg, 0.125 mmol) was treated as described above to obtain **RU1968F3 \* 2TFA** (4 mg, 5%) and **RU1968F4 \* 2TFA** (19 mg, 25%) as white solids.

**RU1968F1: 1H-NMR** (400 MHz, MeOD)  $\delta$  = 7.06 (d, 1H, J=8.5 Hz), 6.58 (dd, 1H, J<sub>1</sub>=8.5 Hz, J<sub>2</sub>=2.6 Hz), 6.51 (d, 1H, J=2.6 Hz), 3.20-3.06 (m, 2H), 3.02-2.92 (m, 1H), 2.86-2.63 (m, 4H), 2.35 (s, 6H), 2.25 (m, 1H), 2.16 (m, 1H), 2.09-1.95 (m, 2H), 1.91-1.78 (m, 2H), 1.70-1.26 (m, 11H), 0.75 (s, 3H).

**13C-NMR** (100 MHz, MeOD)  $\delta$  = 155.15 (C), 138.32 (C), 131.78 (C), 126.74 (C), 132.71 (C), 126.23 (CH), 126.19 (CH), 113.68 (CH), 111.38 (CH), 111.35 (CH), 59.20 (CH<sub>2</sub>), 58.91 (CH<sub>2</sub>), 56.90 (CH), 56.33 (CH), 55.24 (CH), 55.12 (CH<sub>3</sub>), 54.47 (CH), 53.66 (CH), 51.35 (CH), 45.45 (CH<sub>3</sub>), 45.35 (CH<sub>3</sub>), 44.91 (CH<sub>2</sub>), 44.14 (CH<sub>2</sub>), 43.62 (CH), 43.54c(CH), 43.46 (C), 42.35 (C), 39.39 (CH<sub>2</sub>), 39.08 (CH), 38.55 (CH), 34.23 (CH<sub>2</sub>), 29.90 (CH<sub>2</sub>), 29.81 (CH<sub>2</sub>), 28.20 (CH<sub>2</sub>), 27.61 (CH<sub>2</sub>), 27.07 (CH<sub>2</sub>), 26.78 (CH<sub>2</sub>), 26.55 (CH<sub>2</sub>), 25.56, (CH<sub>2</sub>) 23.86 (CH<sub>2</sub>), 23.82 (CH<sub>2</sub>), 22.02 (CH<sub>3</sub>), 19.16 (CH<sub>3</sub>), 18.21 (CH<sub>3</sub>), 12.31 (CH<sub>3</sub>).

**HRMS:** Calc. for C<sub>24</sub>H<sub>38</sub>N<sub>2</sub>OH<sup>+</sup> (M + H) 371.3062, found 371.3049.

**RU1968F2: 1H-NMR** (400 MHz, DMSO-d6)  $\delta$  = 9.03 (s, 1H), 7.04 (d, 1H, J=8.5 Hz), 6.51 (dd, 1H, J<sub>1</sub>=8.5 Hz, J<sub>2</sub>=2.7 Hz), 6.43 (d, 1H, J=2.7 Hz), 3.34 (m, 4H), 2.85 (s, 6H), 2.70 (m, 2H), 2.30 (m, 1H), 2.19-2.06 (m, 2H), 1.89-1.58 (m, 6H), 1.52-1.26 (m, 6H), 1.23 (d, 3H, J=6.4 Hz), 0.84 (s, 3H).

**HRMS:** Calc. for C<sub>24</sub>H<sub>38</sub>N<sub>2</sub>OH<sup>+</sup> (M + H) 371.3062, found 371.3060.

**RU1968F3: 1H-NMR** (400 MHz, DMSO-d6) 8.96 (s, 1H), 7.09 (d, 1H, J=8.3 Hz), 6.57 (dd, 1H, J<sub>1</sub>=8.3 Hz, J<sub>2</sub>=2.7 Hz), 6.51 (d, 1H, J=2.7 Hz), 2.30-2.22 (m, 2H), 2.13 (s, 6H), 1.86-1.50 (m, 9H), 1.41-1.15 (m, 6H), 0.96 (d, 3H, J=6.2 Hz), 0.74 (s, 3H).

**HRMS:** Calc. for C<sub>24</sub>H<sub>38</sub>N<sub>2</sub>OH<sup>+</sup> (M + H) 371.3062, found 371.3055.

**RU1968F4: 1H-NMR** (400 MHz, DMSO-d6) 9.00 (s, 1H), 7.04 (d, 1H, J=8.7 Hz), 6.50 (dd, 1H, J<sub>1</sub>=8.7 Hz, J<sub>2</sub>=2.5 Hz), 6.43 (d, 1H, J=2.5 Hz), 3.30 (m, 4H, below HDO), 2.82 (s, 6H, broad), 2.71 (m, 2H), 2.25 (m, 1H), 2.11 (m, 1H), 1.96 (m, 1H), 1.84-1.65 (m, 6H), 1.51 (m, 2H), 1.39-1.15 (m, 9H), 0.68 (s, 3H).

**HRMS:** Calc. for C<sub>24</sub>H<sub>38</sub>N<sub>2</sub>OH<sup>+</sup> (M + H) 371.3062, found 371.3067.

## Supplementary Figures

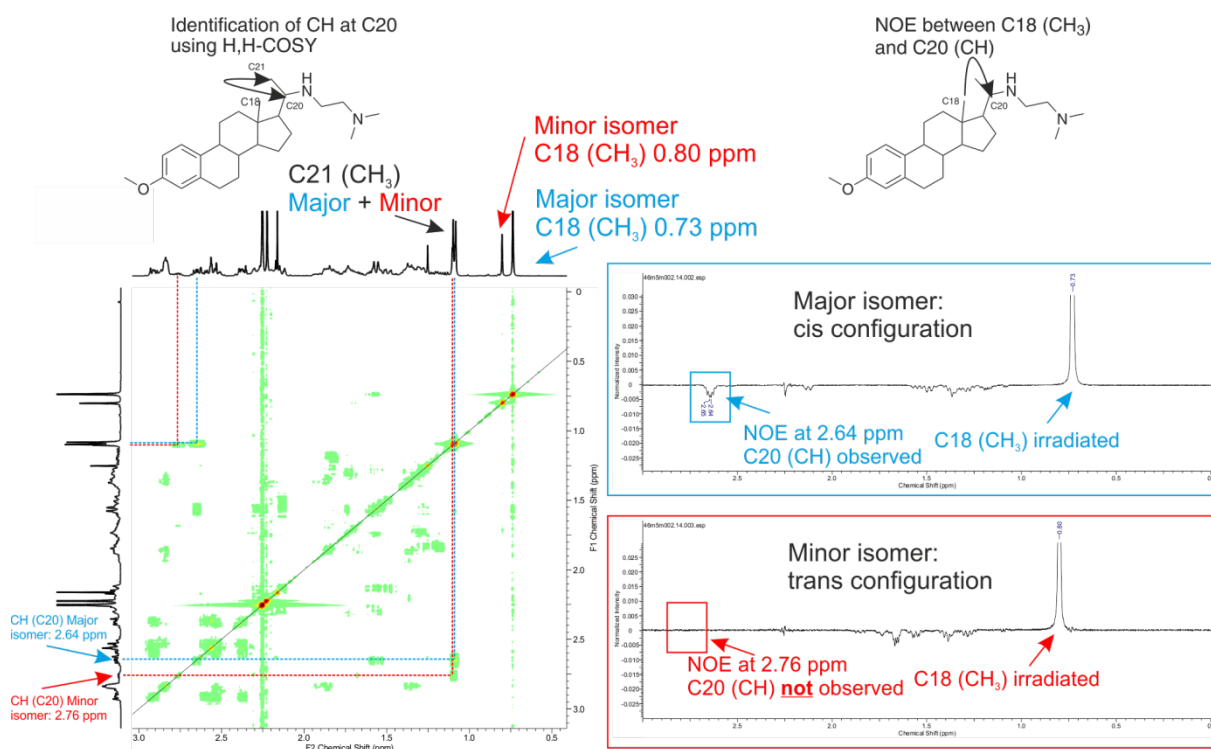

**Figure S1: Relative stereochemistry at C18 and C20 in 3a.** Right panel: H-H COSY spectrum of 3a. C18-CH<sub>3</sub> groups were identified as singlets at  $\delta = 0.73$  ppm (blue, major isomer) and  $\delta = 0.80$  ppm (red, minor isomer). CH<sub>3</sub> groups at C21 were identified as overlapping doublets ( $\delta = 1.09$  ppm major isomer and  $\delta = 1.10$  ppm minor isomer), each of which could be cross-referenced to a multiplet at  $\delta > 2.5$  ppm, which consequently was assigned to the CH-group at C20. (Major isomer, dashed blue lines,  $\delta = 1.09$  ppm  $\rightarrow$   $\delta = 2.64$  ppm; minor isomer, dashed red lines,  $\delta = 1.10$  ppm  $\rightarrow$   $\delta = 2.76$  ppm). Left panel: NOE experiments to assign relative stereochemistry between C18 and C20. Blue box: major isomer; irradiation of the C18-CH<sub>3</sub> singlet ( $\delta = 0.73$  ppm) results in a strong negative NOE resonance at  $\delta = 2.64$  ppm, indicating spatial proximity of C18- and C20-protons. Cis configuration was assigned for this isomer. Red box: minor isomer; irradiation of the C18-CH<sub>3</sub> singlet ( $\delta = 0.80$  ppm) results in no observable NOE resonance at  $\delta = 2.76$  ppm, indicating no spatial proximity of C18- and C20-protons. Trans configuration was assigned for this isomer.

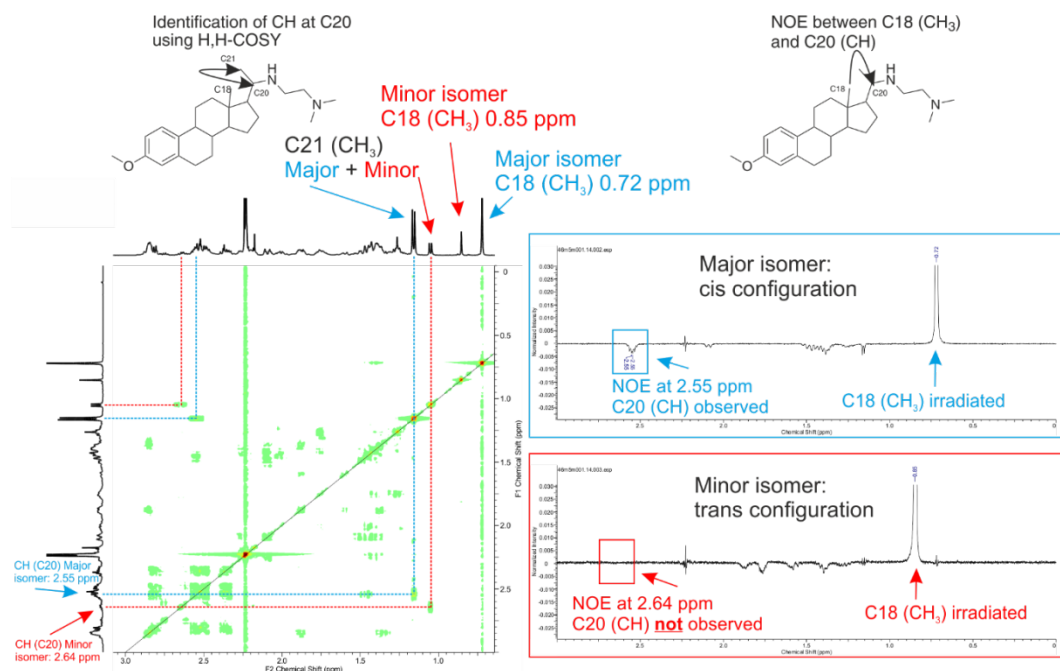

**Figure S2: Relative stereochemistry at C18 and C20 in 3b.** Right panel: H-H COESY spectrum of 3b. C18-CH<sub>3</sub> groups are easily identified as singlets at  $\delta = 0.72$  ppm (blue, major isomer) and  $\delta = 0.85$  ppm (red, minor isomer). CH<sub>3</sub> groups at C21 are identified as doublets ( $\delta = 1.16$  ppm major isomer and  $\delta = 1.05$  ppm minor isomer), each of which could be cross referenced to a multiplet at  $\delta > 2.5$  ppm, which consequently was assigned to the CH-group at C20. (Major isomer, dashed blue lines,  $\delta = 1.16$  ppm  $\rightarrow$   $\delta = 2.55$  ppm; minor isomer, dashed red lines,  $\delta = 1.05$  ppm  $\rightarrow$   $\delta = 2.64$  ppm). Left panel: NOE experiments to assign relative stereochemistry between C18 and C20. Blue box: major isomer; irradiation of the C18-CH<sub>3</sub> singlet ( $\delta = 0.72$  ppm) results in a strong negative NOE resonance at  $\delta = 2.55$  ppm, indicating spatial proximity of C18- and C20-protons. Cis configuration was assigned for this isomer. Red box: minor isomer; irradiation of the C18-CH<sub>3</sub> singlet ( $\delta = 0.85$  ppm) results in no observable NOE resonance at  $\delta = 2.64$  ppm, indicating no spatial proximity of C18- and C20-protons. Trans configuration was assigned for this isomer.

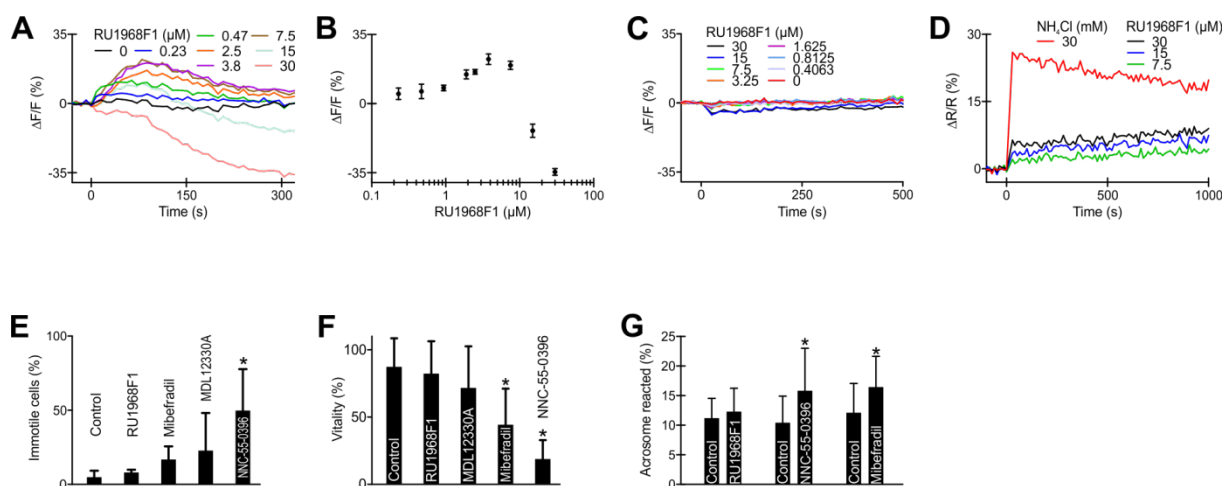

**Figure S3: The action of RU1968F1 itself in human sperm.** (A) RU1968F1-induced Ca<sup>2+</sup> signals in human sperm. (B) Dose-response relation of the RU1968F1-evoked signal amplitudes ( $n = 3$ ). Error bars indicate SD. (C) RU1968F1-induced Ca<sup>2+</sup> signals in human sperm at 10 nM extracellular Ca<sup>2+</sup>. (D) Changes in pH<sub>i</sub> evoked by RU1968F1 or NH<sub>4</sub>Cl in sperm loaded with the pH indicator BCECF. The signals were recorded in the FluoStar. (E) Fraction of immotile sperm in the absence ( $n = 9$ ) and presence of the RU1968F1 (30  $\mu\text{M}$ ), MDL12330A (100  $\mu\text{M}$ ), Mibefradil (60  $\mu\text{M}$ ), or NNC-55-0396 (30  $\mu\text{M}$ ) ( $n = 5$ ). Error bars indicate SD. \* $P < 0.05$  versus control. (F) Fraction of vital cells in the absence and presence of the inhibitors ( $n = 5$ ). Vitality was evaluated by

the Eosin test, performed according to the WHO manual. Error bars indicate SD. \*P < 0.05 versus control (G) Fold increase in acrosome-reacted sperm after treatment with RU1968F1 (30  $\mu$ M), Mibefradil (40  $\mu$ M), or NNC-55-0396 (20  $\mu$ M) (n = 10). Error bars indicate SD. \*P < 0.05 versus control

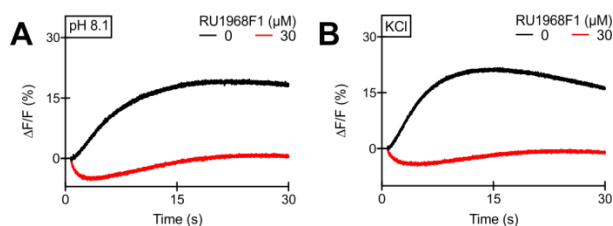

**Figure S4: RU1968F1 inhibits depolarization- and alkaline-evoked  $Ca^{2+}$  signals in human sperm.** (A)  $Ca^{2+}$  signals evoked by mixing of sperm with pH8.6-HTF and RU1968F1 in a stopped-flow apparatus. The final pH after mixing was 8.1. (B)  $Ca^{2+}$  signals evoked by mixing of sperm with  $K^+$ -HTF and RU1968F1 in a stopped-flow apparatus. The final  $K^+$  concentration after mixing was 51.25 mM.

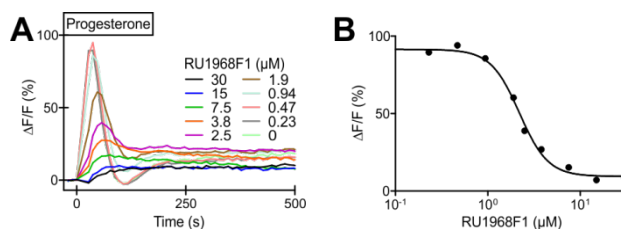

**Figure S5: RU1968F1 inhibits progesterone responses in sperm bathed in  $NH_4Cl$ .** (A) Progesterone-induced  $Ca^{2+}$  signals (500 nM) in human sperm bathed for 20 minutes in 30 mM  $NH_4Cl$ . (B) Dose-response relation of signals from (A). Mean  $IC_{50}$ : 3.1  $\pm$  1.2 (n = 5).

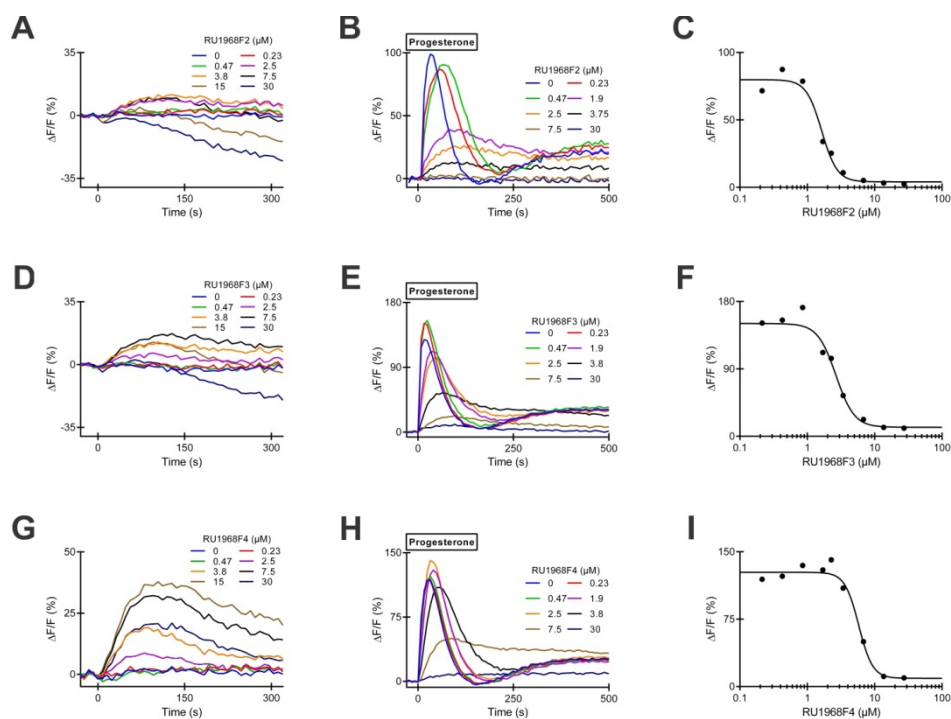

**Figure S6: Action of RU1968F2-F4 on their own and on CatSper-mediated  $Ca^{2+}$  signals in human sperm populations.** (A) RU1968F2-induced  $Ca^{2+}$  signals in human sperm. (B) Progesterone (500 nM)-induced  $Ca^{2+}$  signals in human sperm in the presence of RU1968F2; (C) Dose-response relation of the signal amplitudes from (B) ( $IC_{50}$  = 1.6  $\mu$ M). (D) RU1968F3-induced  $Ca^{2+}$  signals in human sperm. (E) Progesterone-induced  $Ca^{2+}$  signals in the presence of RU1968F3. (F) Dose-response relation of the signal amplitudes from (E) ( $IC_{50}$  = 2.7  $\mu$ M).

$\mu\text{M}$ ). (G) RU1968F4-induced  $\text{Ca}^{2+}$  signals in human sperm. (H) Progesterone-induced  $\text{Ca}^{2+}$  signals in human sperm in the presence of RU1968F4. (I) Dose-response relation of the signal amplitudes from (H) ( $\text{IC}_{50} = 5.8 \mu\text{M}$ )

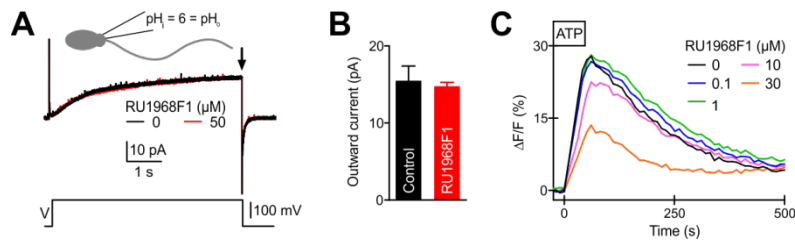

**Figure S7: Action of RU1968F1 on Hv1 currents in human sperm and ATP-evoked  $\text{Ca}^{2+}$  responses in mouse sperm.** (A) Voltage-gated proton currents recorded from a human sperm cell before (blue) and after superfusion with RU1968F1 (red). (B) Mean outward current before and after application of RU1968F1 ( $n = 3$ ). Arrow in panel (A) indicates the time point at which outward currents were determined. Error bars indicate SD. (C) ATP-evoked  $\text{Ca}^{2+}$  signals in  $\text{CatSper1}^{-/-}$  mouse sperm in the absence and presence of RU1968F1. The  $\text{Ca}^{2+}$  responses were recorded in the FluoStar. ATP was injected at  $t = 0$  s.

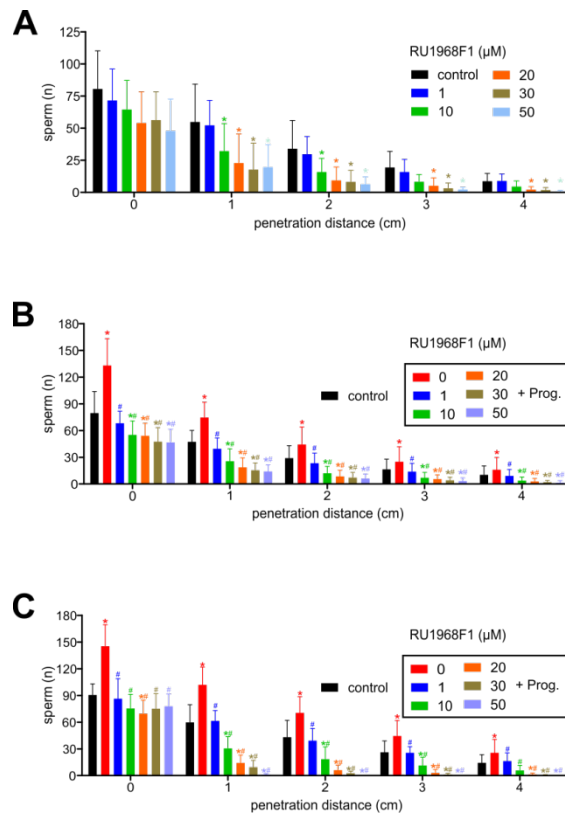

**Figure S8: RU1968F1 suppresses penetration of sperm into viscous media.** (A) Number of sperm at penetration distances of 0-4 cm in a modified Kremer's sperm-mucus penetration test. Sperm were incubated in buffer (0) or RU1968F1 ( $n = 21$ ). Error bars indicate SD.  $*P < 0.05$  versus control (0, without RU1968F1).  $^{\#}P < 0.05$  versus progesterone without RU1968F1 (B) Number of sperm after incubation in buffer (0), progesterone, or progesterone plus RU1968F1 ( $n = 21$ ). Error bars indicate SD.  $*P < 0.05$  versus control,  $^{\#}P < 0.05$  versus progesterone without RU1968F1 (0, without progesterone). (C) Number of sperm bathed in buffer (control) or progesterone when the capillary included buffer (0) or RU1968F1 ( $n = 6$ ). Error bars indicate SD.  $*P < 0.05$  versus control (0, without progesterone),  $^{\#}P < 0.05$  versus progesterone without RU1968F1 (0, without progesterone)

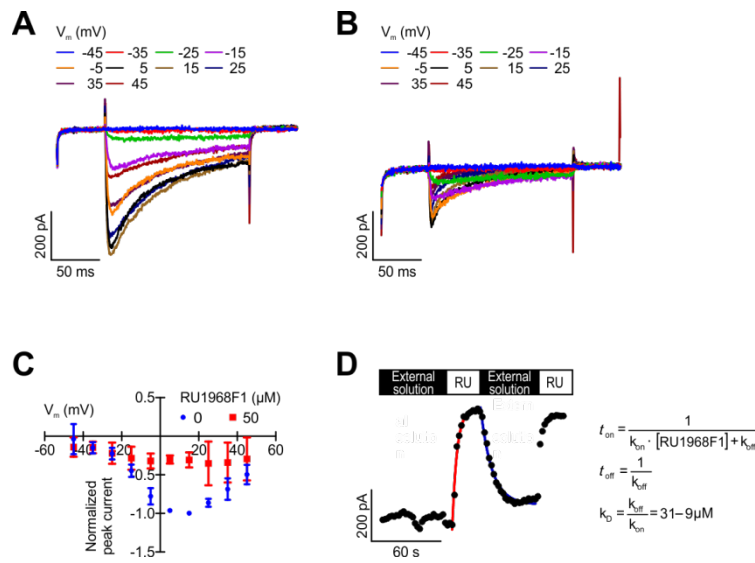

**Figure S9: RU1968F1 inhibits Ca<sub>v</sub>1.2 channels.** Representative whole-cell current recorded from a HEK293T cell expressing human Ca<sub>v</sub>1.2+β<sub>2b</sub>+α<sub>2δ</sub>1 before (A) and after perfusion of the cell with 50 μM RU1968F1 (B). (C) Plotting the mean peak current versus voltage demonstrates the incomplete block of Ca<sub>v</sub>1.2 by RU1968F1 (n = 5). (D) Peak currents at +20 mV recorded every 2 s while the cell was perfused with external solution or solution containing 50 μM RU1968F1. The reduction and recovery of the current during the wash-in (red) and wash-out (blue) of RU1968F1, respectively, was fitted with an exponential function. The time constants were used to calculate an approximate affinity (K<sub>D</sub>) of 31 ± 9 μM (n = 4).

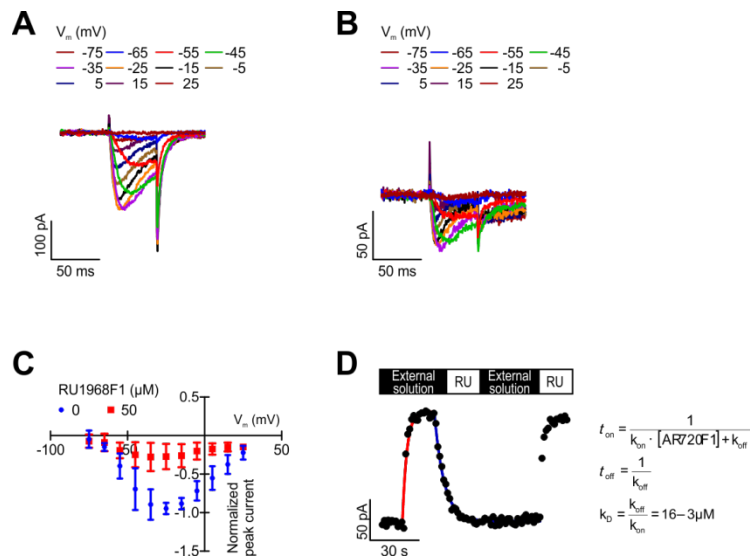

**Figure S10: RU1968F1 inhibits Ca<sub>v</sub>3.2 channels.** Representative whole-cell current recorded from a HEK293T cell expressing Ca<sub>v</sub>3.2 before (A) and after perfusion of the cell with 50 μM RU1968F1 (B). (C) Plotting the mean peak current versus voltage demonstrates the incomplete block of Ca<sub>v</sub>3.2 by RU1968F1 (n = 5). (D) Peak currents at +20 mV recorded every 2 s while the cell was perfused with external solution or solution containing 50 μM RU1968F1. The reduction and recovery of the current during the wash-in (red) and wash-out (blue) of RU1968F1, respectively, was fitted with an exponential function. The time constants were used to calculate an approximate affinity (K<sub>D</sub>) of 16 ± 3 μM (n = 4).
